# Supplementary material for: Exploring a GE/Nafion/Co-MOF nanosheets/CuO NPs/GOx powered electrochemical biosensor for ultrasensitive detection of rebaudioside A
Source: Royal Society of Chemistry journal article supplement (doi:10.1039/d5na00591d), 2025-09-08
Supplement: d5na00591d1.pdf [file d5na00591d1.pdf]

## Exploring a GE/Nafion/Co-MOF nanosheets/CuO NPs/GOx powered electrochemical biosensor for ultrasensitive detection of Rebaudioside A

Manju Manuel<sup>a</sup>, Suvardhan Kanchi<sup>a\*</sup>, Venkataramana Losetty<sup>b</sup>

<sup>a</sup>Department of Chemistry, CHRIST University, Bengaluru, 560 029, India

<sup>b</sup>Department of Chemistry, Vel Tech Rangarajan Dr.Sagunthala R&D Institute of Science and Technology, Avadi, Chennai, 600 062, India

### 1. Extraction of Graphite Rod from the Discharged Batteries

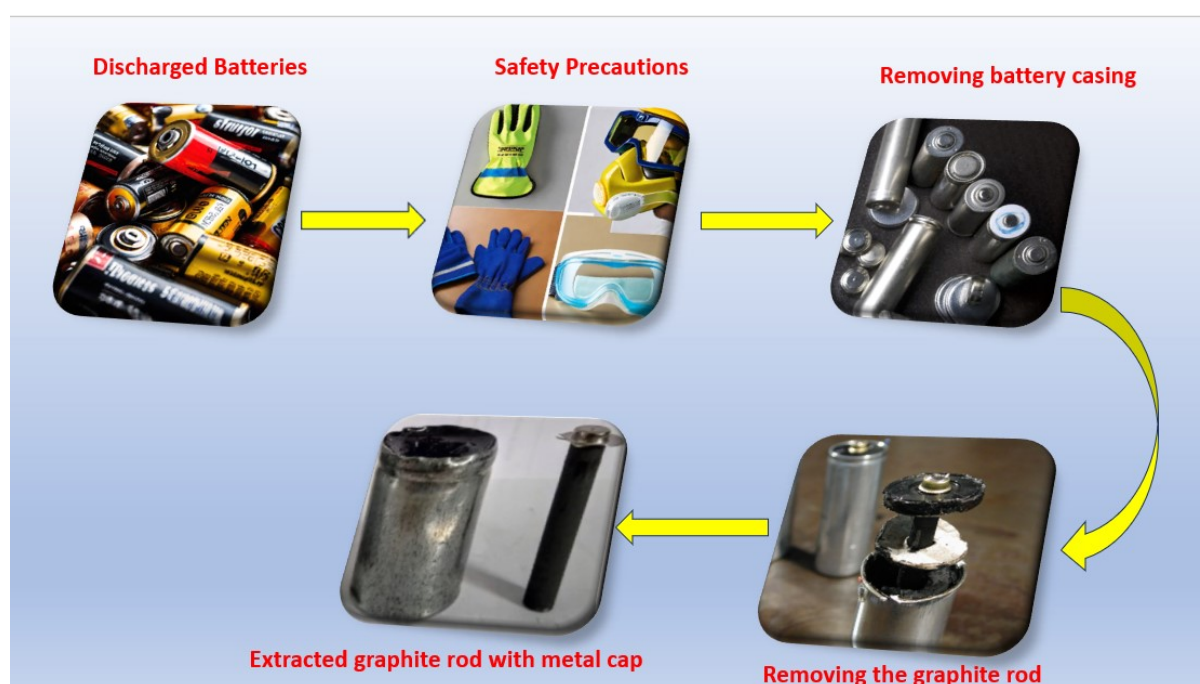

S.1 . Illustration of the safe dismantling of a graphite rod from batteries.

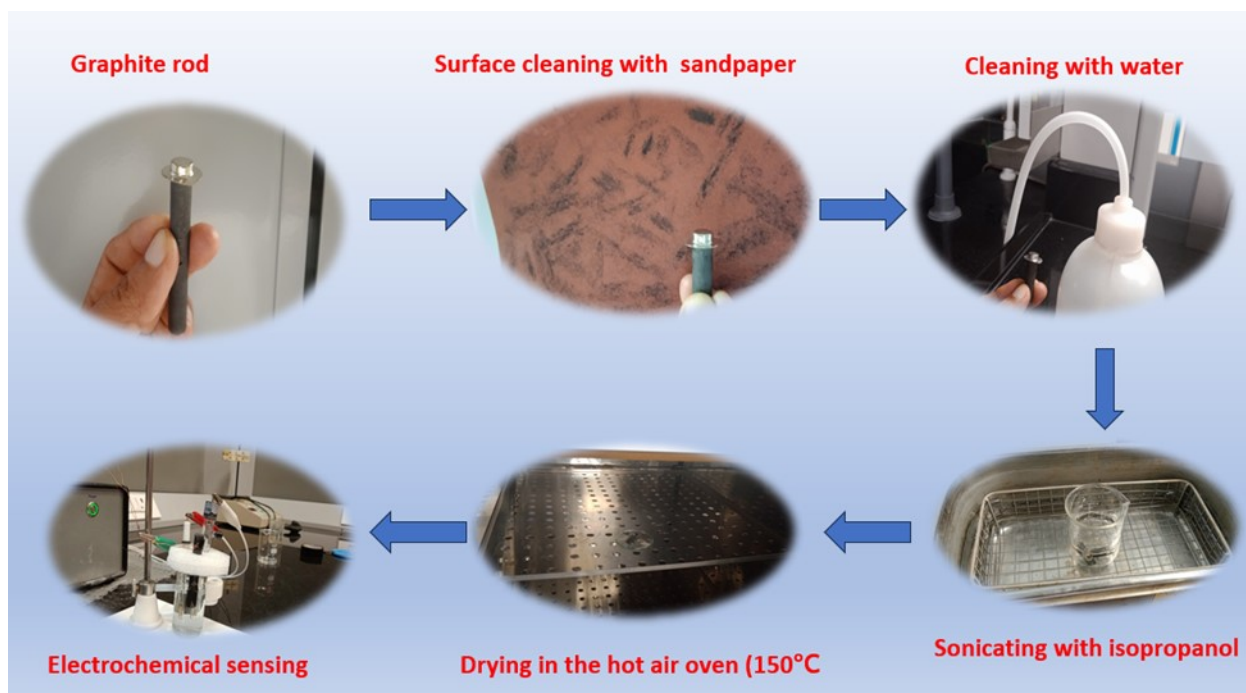

**S.2** Schematic representation of the cleaning process of the recovered graphite rod

## 2. UV -Visible spectroscopy

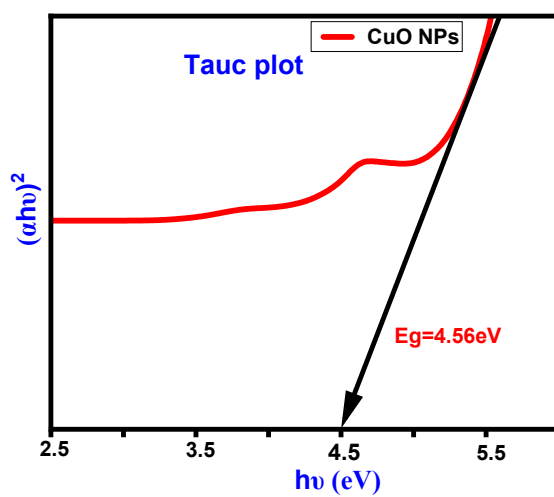

**S.3.** Tauc plot of the biosynthesized CuO NPs

## 2. Zeta potential analysis of CuO NPs

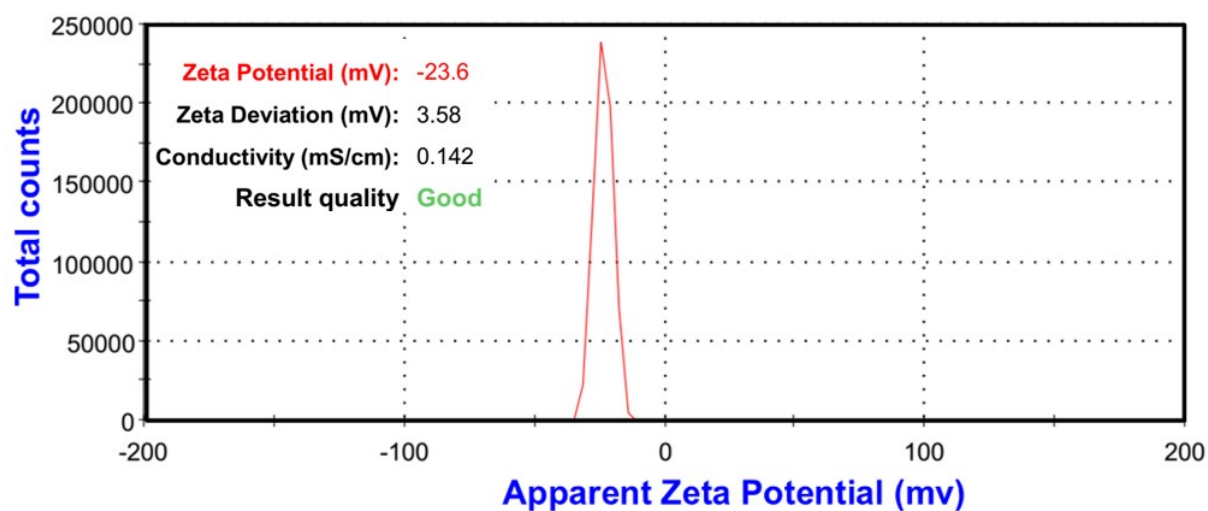

### S.4. Zeta potential analysis of biosynthesised CuO NPs

## 3. DLS Particle Size Analysis

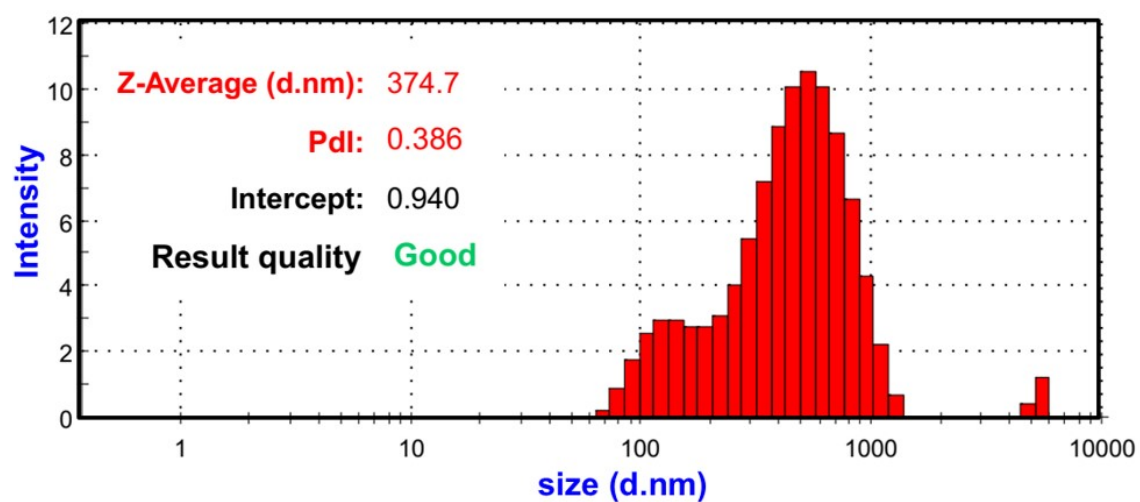

### S.5. Particle Size analysis of biosynthesized CuO NPs

#### 4. Spectroscopic Analysis of Co-MOF

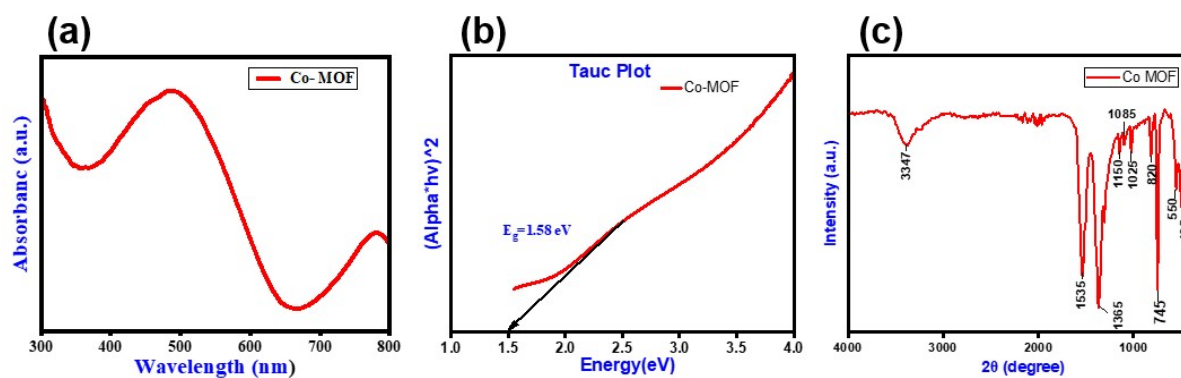

S.6. (a) UV-Vis analysis of Co-MOF; (b) Tauc plot of Co-MOF; (c) FTIR spectroscopy of Co-MOF.

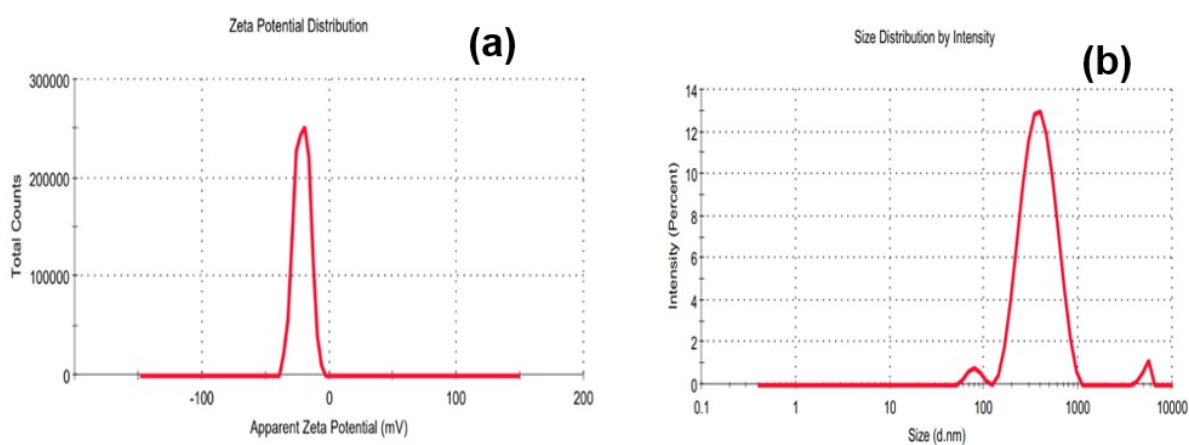

S.7. (a) Zeta Potential of Co-MOF; (b) DLS analysis of Co-MOF

## 5. Energy-Dispersive X-ray Spectroscopy

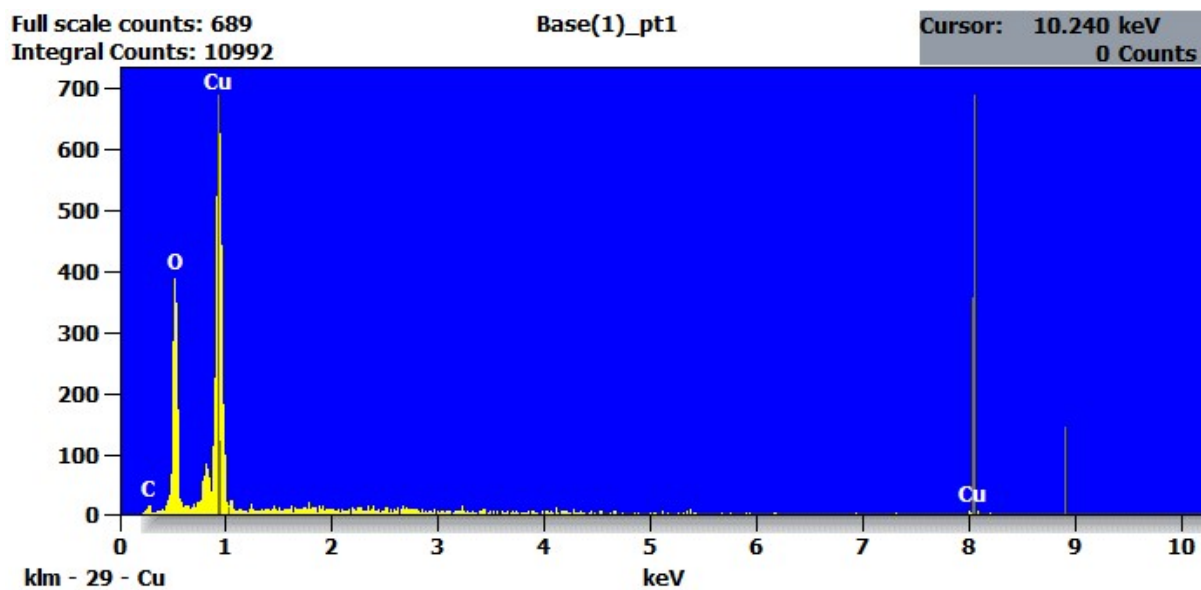

### S.6 EDS Analysis of CuO NPs

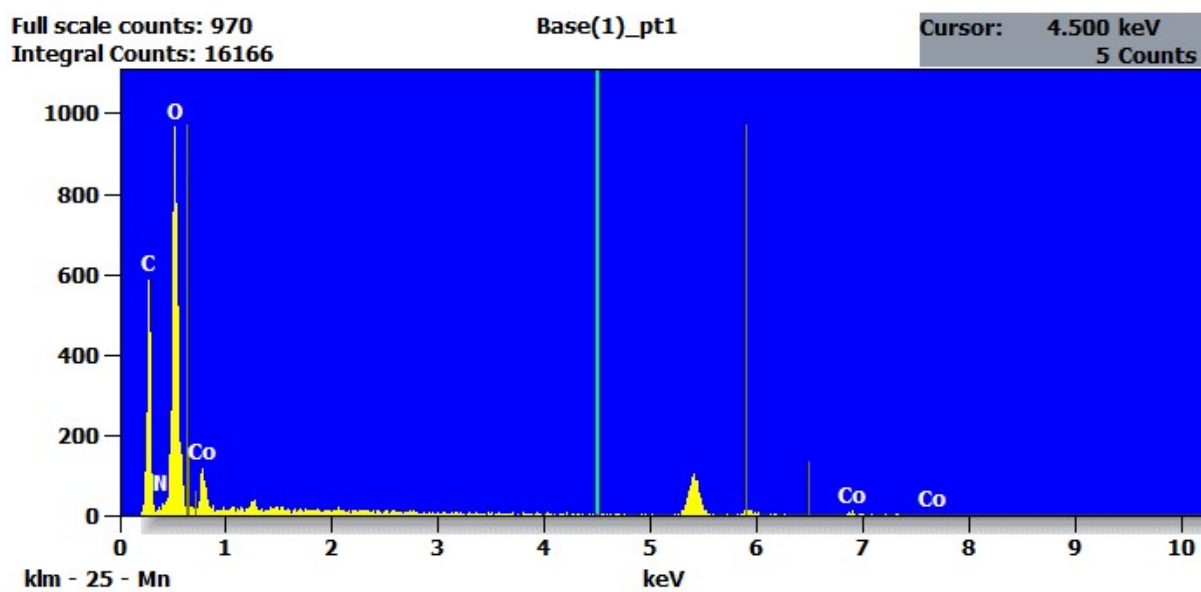

### S.7 EDS Analysis of Co-MOF

## 6. Method Optimization

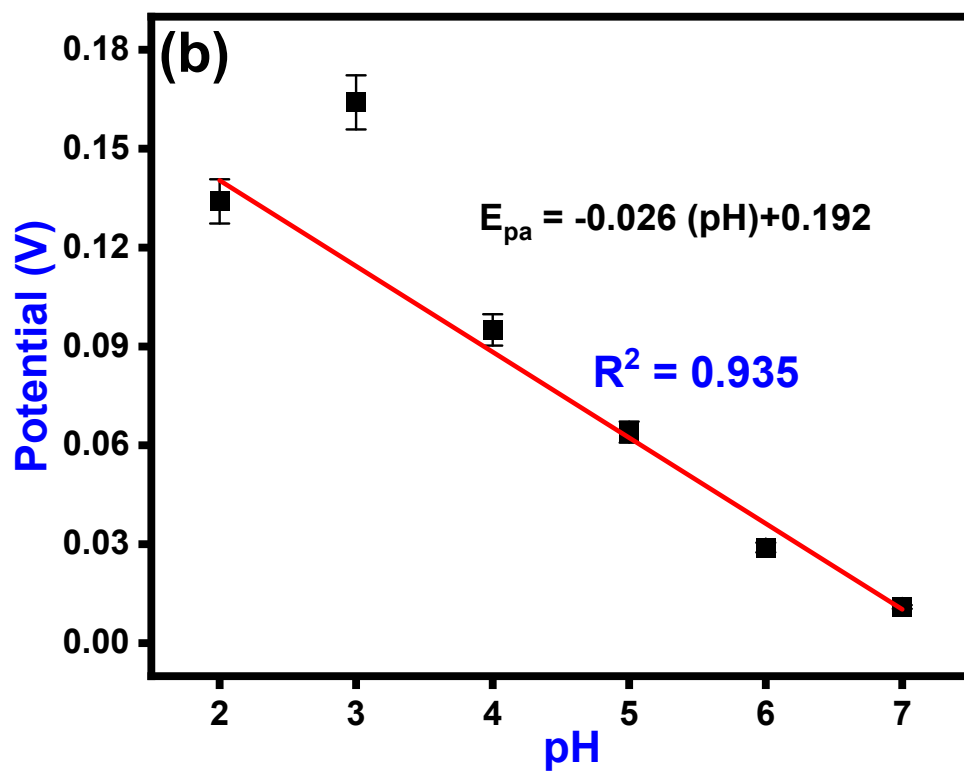

S.8 pH Vs. potential

**Supplementary Table 1:** Comparison of the present electrochemical biosensor with reported sensors from the literature.

| Glycoside          | Method                               | Stability/<br>Precision | Linear Range                  | LOD                   | Ref.         |
|--------------------|--------------------------------------|-------------------------|-------------------------------|-----------------------|--------------|
| Rebaudioside A     | Electrochemical Biosensor (GCE)      | Good (stable signal)    | 0.001–0.05 mM & 0.075–1.25 mM | 0.264 $\mu$ M         | [1]          |
| Steviol Glycosides | Electrochemical Immunosensor (GCE)   | Stable signal           | 0.1996 mg/L to 1.5748 mg/L    | 0.6346 mg/L.          | [2]          |
| Rebaudioside A     | HPLC-UV (RP-HPLC)                    | RSD <2%                 | 0.0005–1.5 mg/mL              | 0.01 mg/mL            | [3]          |
| Stevioside         | UHPLC-ESI-MS/MS                      | RSD 1.1–9.3%            | 0.2–1.0 mg/L                  | 0.003–0.078 $\mu$ g/g | [4]          |
| Rebaudioside D     | UHPLC-ESI-MS/MS                      | RSD 1.1–9.3%            | 0.2–1.0 mg/L                  | 0.003–0.078 $\mu$ g/g | [5]          |
| Rebaudioside M     | UHPLC-ESI-MS/MS                      | RSD 1.1–9.3%            | 0.2–1.0 mg/L                  | 0.003–0.078 $\mu$ g/g | [4]          |
| Glucose            | Electrochemical sensor (GCE)         | Stable signal           | 0.05–9.5 mM                   | 1.4 $\mu$ M           | [6]          |
| Sucrose            | Electrochemical sensor (SPE)         | RSD<2%                  | 0.5 - 4.5 mM                  | 0.02 mM               | [7]          |
| Caffeine           | Electrochemical sensor (GCE)         | 4.5%                    | 1–30 $\mu$ M                  | 20 $\mu$ M            | [8]          |
| Fructose           | Electrochemical Sensor(GCE)          | Stable signal           | 0.3 - 1.5 M                   | 0.008 mM              | [9]          |
| Rebaudioside A     | Electrochemical Biosensor (Graphite) | 3.9%                    | 2-14 $\mu$ M                  | 0.23 $\mu$ M          | Present work |

## References:

- [1] A. Bathinapatla, S. Kanchi, P. Singh, M. I. Sabela, and K. Bisetty, “An ultrasensitive performance enhanced novel cytochrome c biosensor for the detection of rebaudioside A,” *Biosens. Bioelectron.*, vol. 77, pp. 116–123, 2016, doi: <https://doi.org/10.1016/j.bios.2015.09.004>.
- [2] P. Hloma, “DEVELOPMENT OF AN ELECTROCHEMICAL IMMUNOSENSOR FOR THE DETECTION OF STEVIOL GLYCOSIDES BY EXPERIMENTAL AND COMPUTATIONAL METHODS By : Submitted in fulfilment of the requirements of the degree of Master of Applied Science in Chemistry in the Faculty of App,” no. April, 2020.
- [3] N. S. Kolate, H. Mishra, S. G. Kini, G. Raghavan, and T. B. Vyas, “A Validated RP-HPLC Method for Quantification of Steviol Glycoside: Rebaudioside A in Extracts of Stevia Rebaudiana Leaf,” *Chromatographia*, vol. 84, no. 1, pp. 21–26, 2021, doi: 10.1007/s10337-020-03980-2.
- [4] Y. Phungsiangdee, P. Chaothong, W. Karnpanit, and P. Tanaviyutpakdee, “Validation of UHPLC-ESI-MS/MS Method for Determining Steviol Glycoside and Its

Derivatives in Foods and Beverages,” *Foods*, vol. 12, no. 21. 2023. doi: 10.3390/foods12213941.

- [5] I. Aranda-González, Y. Moguel-Ordoñez, and D. Betancur-Ancona, “Determination of rebaudioside A and Stevioside in leaves of *S. rebaudiana* Bertoni grown in México by a validated HPLC method,” *Am. J. Anal. Chem.*, vol. 6, no. 11, p. 878, 2015.
- [6] R. Ahmad *et al.*, “Nano-donuts shaped nickel oxide nanostructures for sensitive non-enzymatic electrochemical detection of glucose,” *Microsyst. Technol.*, vol. 28, no. 1, pp. 313–318, 2022, doi: 10.1007/s00542-020-04754-4.
- [7] N. Zhuang *et al.*, “Rapid determination of sucrose and glucose in microbial fermentation and fruit juice samples using engineered multi-enzyme biosensing microchip,” *Microchem. J.*, vol. 164, p. 106075, 2021, doi: <https://doi.org/10.1016/j.microc.2021.106075>.
- [8] L. Redivo, M. Stredanský, E. De Angelis, L. Navarini, M. Resmini, and L. Švorc, “Bare carbon electrodes as simple and efficient sensors for the quantification of caffeine in commercial beverages,” *R. Soc. open Sci.*, vol. 5, no. 5, p. 172146, 2018.
- [9] M. S. Sha *et al.*, “Evaluating fructose content in poultry feed: electrochemical insights,” *J. Appl. Electrochem.*, vol. 55, no. 4, pp. 1089–1097, 2025, doi: 10.1007/s10800-024-02212-x.
